# Supplementary material for: Development of a Rapid UHPLC-PDA Method for the Simultaneous Quantification of Flavonol Contents in Onions (Allium cepa L.)
Source: PubMed Central journal article supplement (PMC8066725; doi:10.3390/ph14040310), 2021-04-01
Supplement: pharmaceuticals-14-00310-s001.pdf [file pharmaceuticals-14-00310-s001.pdf]

SUPPLEMENTARY MATERIAL

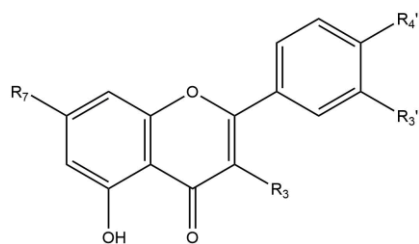

| Flavonol type                            | R3    | R7    | R3'   | R4'   |
|------------------------------------------|-------|-------|-------|-------|
| Quercetin 3- <i>O</i> -glucoside         | O-Glu | OH    | OH    | OH    |
| Quercetin 4'- <i>O</i> -glucoside        | OH    | OH    | OH    | O-Glu |
| Quercetin 3,4'- <i>O</i> -diglucoside    | O-Glu | OH    | OH    | O-Glu |
| Quercetin 7,4'- <i>O</i> -diglucoside    | OH    | O-Glu | OH    | O-Glu |
| Quercetin 3,7,4'- <i>O</i> -triglucoside | O-Glu | O-Glu | OH    | O-Glu |
| Isorhamnetin 4'- <i>O</i> -glucoside     | OH    | OH    | O-CH3 | O-Glu |
| Isorhamnetin 3,4'- <i>O</i> -diglucoside | O-Glu | OH    | O-CH3 | O-Glu |

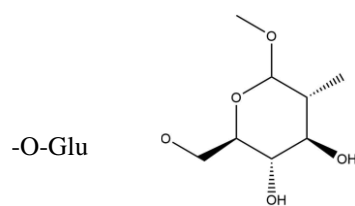

Figure S1. Structural types of analyzed flavonols.

**Table S1.** characteristics of the different onions studied.

| Onion variety        | Origin                                 | Supermarket | Format                                                    | Company               | Caliber (mm) |
|----------------------|----------------------------------------|-------------|-----------------------------------------------------------|-----------------------|--------------|
| Spring white onion 1 | Spain                                  | DÍA         | Sold by mesh net bag<br>2 kg                              | La Gramola            | 50/90        |
| Sweet white onion 2  | Chile                                  | LIDL        | Sold individually                                         | -                     | -            |
| Spring white onion 3 | Spain                                  | Mercadona   | Sold 3 by 3                                               | Tara                  | 65           |
| Sweet white onion 4  | Spain                                  | Mercadona   | Sold by mesh net bag<br>2 kg                              | Tara                  | 55           |
| Sweet white onion 5  | Spain                                  | Carrefour   | Sold in bulk                                              | -                     | 70/100       |
| Sweet white onion 6  | Spain                                  | Carrefour   | Sold by mesh net bag<br>500 g                             | Ajos Malsamar<br>S.L. | 60/80        |
| Yellow onion 1       | Spain (Valencia)                       | LIDL        | Unit                                                      | -                     | -            |
| Yellow onion 2       | Spain                                  | Carrefour   | Sold in bulk                                              | -                     | 55/75 mm     |
| Yellow onion 3       | Spain                                  | Carrefour   | Sold 3 by 3.<br>Assortment of<br>yellow, red and<br>white | -                     | 60/80        |
| Red onion 1          | Spain                                  | LIDL        | Sold by mesh net bag<br>500 g                             | Linda                 | 50/70 mm     |
| Red onion 2          | Austria                                | Mercadona   | Sold by mesh net bag<br>500 g                             | Tara                  | 50/90 mm     |
| Red onion 3          | Spain (Cuenca)                         | DÍA         | Sold by mesh net bag<br>500 g                             | La Gramola            | 50/70 mm     |
| Red onion 4          | Spain (Castilla la<br>Mancha/Valencia) | LIDL        | Sold individually                                         | -                     | -            |

**Table S2.** Mass spectra information for the seven flavonols identified in onion bulbs by UHPLC-PDA-Q-ToF-MS in negative ESI mode.

| Peak number | Flavonols present in onion      | Molecular formula                               | Maximum absorbance wavelength (nm) | Time of elution (min) | Theoretical mass [M-H] <sup>-</sup> (m/z) | Measured mass [M-H] <sup>-</sup> (m/z) |
|-------------|---------------------------------|-------------------------------------------------|------------------------------------|-----------------------|-------------------------------------------|----------------------------------------|
| 1           | Quercetin 3,7,4'-O-triglucoside | C <sub>33</sub> H <sub>40</sub> O <sub>22</sub> | 346.7                              | 2.873                 | 787.1433                                  | 787.1421                               |
| 2           | Quercetin 7,4'-O-diglucoside    | C <sub>27</sub> H <sub>30</sub> O <sub>17</sub> | 371.8                              | 4.507                 | 625.1425                                  | 625.1396                               |
| 3           | Quercetin 3,4'-O-diglucoside    | C <sub>27</sub> H <sub>30</sub> O <sub>17</sub> | 343.2                              | 5.138                 | 625.1410                                  | 625.1398                               |
| 4           | Isorhamnetin 3,4'-O-diglucoside | C <sub>28</sub> H <sub>32</sub> O <sub>17</sub> | 346.7                              | 5.213                 | 639.1566                                  | 639.1559                               |
| 5           | Quercetin 3-O-glucoside         | C <sub>21</sub> H <sub>20</sub> O <sub>12</sub> | 346.7                              | 5.341                 | 463.0877                                  | 463.0886                               |
| 6           | Quercetin 4'-O-glucoside        | C <sub>21</sub> H <sub>20</sub> O <sub>12</sub> | 362.3                              | 5.487                 | 463.0882                                  | 463.0873                               |
| 7           | Isorhamnetin 4'-O-glucoside     | C <sub>22</sub> H <sub>22</sub> O <sub>12</sub> | 371.1                              | 5.543                 | 477.1038                                  | 477.1040                               |
